# Supplementary material
Source: PubMed Central journal article supplement (PMC5744652)
Supplement: EHP767.s001.acco.pdf [file EHP767.s001.acco.pdf]

**Note to readers with disabilities:** *EHP* strives to ensure that all journal content is accessible to all readers. However, some figures and Supplemental Material published in *EHP* articles may not conform to [508 standards](#) due to the complexity of the information being presented. If you need assistance accessing journal content, please contact [ehp508@niehs.nih.gov](mailto:ehp508@niehs.nih.gov). Our staff will work with you to assess and meet your accessibility needs within 3 working days.

### **Supplemental Material**

#### **Assessing Exposure to Household Air Pollution: A Systematic Review and Pooled Analysis of Carbon Monoxide as a Surrogate Measure of Particulate Matter**

Ellison Carter, Christina Norris, Kathie L. Dionisio, Kalpana Balakrishnan, William Checkley, Maggie L. Clark, Santu Ghosh, Darby W. Jack, Patrick L. Kinney, Julian D. Marshall, Luke P. Naeher, Jennifer L. Peel, Sankar Sambandam, James J. Schauer, Kirk R. Smith, Blair J. Wylie, and Jill Baumgartner

#### **Table of Contents**

**Table S1.** Characteristics of study population represented by paired measurements of personal exposure to PM<sub>2.5</sub> and CO

**Table S2.** Categorization of covariates

**Table S3.** Personal PM<sub>2.5</sub> exposure measurement methods and quality assurance and quality control protocols

**Table S4.** Personal CO exposure measurement methods and quality assurance and quality control protocols

**Table S5.** Characteristics of studies with paired measurements of cooking area PM<sub>2.5</sub> and CO concentrations

**Figure S1.** (a) Locally weighted scatterplot smoothing line shown for natural log-transformed PM<sub>2.5</sub> personal exposures versus natural log-transformed CO personal exposures plotted for nine unique studies. (b) Natural cubic spline model (3 knots) ln(PM<sub>2.5</sub>) versus ln(CO), including fuel, urbanicity, season, CO measurement type, and study covariates in the model (n = 703 pairs).

**Table S6.** Arithmetic and geometric (GM) means (95% confidence intervals (CI)) and ranges for nine studies with paired measurements of personal exposure to PM<sub>2.5</sub> and CO

**Table S7.** Arithmetic and geometric (GM) means (95% confidence intervals (CI)) and ranges and interquartile ranges (IQR) for 18 studies with paired measurements of cooking area PM<sub>2.5</sub> and CO

**Figure S2.** Natural cubic spline model (3 knots) of the ln(PM<sub>2.5</sub>)-ln(CO) relationship with 95% confidence intervals for cooking area PM<sub>2.5</sub> and CO concentrations (n=981 paired observations from 17 of 18 studies in the pooled analysis)

**Figure S3.** Comparison of estimates of the slope of ln(PM<sub>2.5</sub>) on ln(CO) ( $\pm$ 95% confidence intervals) for cooking area concentrations using univariate and multivariate linear regression models for the full dataset and stratified by fuel use, setting, season, and CO measurement. The R<sup>2</sup> values and RMSE for each model are reported to the right of the plotted ln(CO) slope.

**Table S8.** Comparison of R<sup>2</sup> and root mean squared error (RMSE) are reported for models of ln(PM<sub>2.5</sub>) exposure on un-transformed CO exposure, [CO], using all data and stratified subsets

**Table S9.** Comparison of R<sup>2</sup> and root mean squared error (RMSE) are reported for models of ln(PM<sub>2.5</sub>) exposure on un-transformed CO cooking area concentrations, [CO], using all data and stratified subsets

**Table S10.** Comparison of univariate and multivariate model results for individual studies, adjusting for as many covariates as there was variation to do so. The R<sup>2</sup> and root mean squared error (RMSE) are reported for each model

**Figure S4.** PM versus CO emission rates (grams/minute) from standardized Water Boiling Tests conducted by Jetter et al. (2012) for stove-fuel combinations tested with wood fuel only (a) and stove-fuel combinations tested with non-wood fuel (b) under conditions of cold start, hot start, and simmering

## References

**Table S1. Characteristics of study population represented by paired measurements of personal exposure to PM<sub>2.5</sub> and CO**

| Author/Publication Year<br>(setting)                   | Study Population with Description of Stoves Used                                                                                                                                                                                                                                                                               |
|--------------------------------------------------------|--------------------------------------------------------------------------------------------------------------------------------------------------------------------------------------------------------------------------------------------------------------------------------------------------------------------------------|
| Armendáriz-Arnez et al. 2008<br>(rural Mexico)         | 60 non-smoking women from Comachuen (indigenous agricultural community) who burn wood in traditional, unvented stoves ( <i>fogon</i> )                                                                                                                                                                                         |
| Balakrishnan et al. 2015<br>(rural India)              | 45 observations among non-smoking women who burned dung and wood; 35 paired measurements during use of traditional unvented stoves and 10 paired measurements during use of unvented gasifier stoves (Philips)                                                                                                                 |
| Commodore et al. 2013<br>(rural Peru)                  | 20 non-smoking mothers or childcare providers who used biomass and were participating in a community randomized-control trial; 11 control households using open fires, vented, unvented, or gas and 9 intervention households with vented stoves (OPTIMA)                                                                      |
| Dionisio et al. 2012<br>(peri-urban The Gambia)        | 48 children recruited who were younger than 61 months and older than 15 months at the time of measurement (mean: 34 ± 9 months); 29 complete paired personal PM <sub>2.5</sub> and CO exposure measurements; households burned biomass in open fires                                                                           |
| Ellegard and Egneus 1993<br>(urban Zambia)             | 268 low-income, non-smoking women >15 years old who undertook primary cooking activities and burned biomass in traditional, unvented open fires or traditional <i>mbaulas</i> charcoal stoves; some households reported using electricity in addition to solid fuels                                                           |
| Hartinger et al. 2013<br>(rural Peru)                  | 93 non-smoking mothers or childcare-providers from households enrolled in a home-based environmental intervention study; 48 participants burned biomass in open fires and unvented stoves and 43 burned biomass in vented intervention stoves (OPTIMA), 2 households belonged to near-by village with a different vented stove |
| Fitzgerald et al. 2012<br>(rural Peru)                 | 64 non-smoking women aged 18-45 years old who undertook primary cooking activities and burned wood in indoor open fires; paired measurements pre- and post-intervention were made in households using open fires and vented intervention stoves, respectively                                                                  |
| McCracken et al. 2013<br>(rural Guatemala)             | 116 non-smoking women who undertook primary cooking activities and burned wood in indoor open fires or vented woodstoves; 40 with one paired measurement, 52 with two paired measurements, and 24 with three paired measurements for a total of 216 observations                                                               |
| Mukhopadhyay et al. 2012<br>(rural India)              | 32 non-smoking women who undertook primary cooking activities and burned wood and/or cow dung using unvented stoves; 71% of cooking locations were outdoors, of which 82% were completely uncovered; personal PM <sub>2.5</sub> measurements made only during cooking                                                          |
| Naeher et al. 2000<br>(rural and semi-urban Guatemala) | 3 mother-child pairs (child <15 months) monitored under each of the following stove/fuel combinations separately: gas stove, traditional vented                                                                                                                                                                                |

---

|                                               |                                                                                                                                                                                                                                                                                                           |
|-----------------------------------------------|-----------------------------------------------------------------------------------------------------------------------------------------------------------------------------------------------------------------------------------------------------------------------------------------------------------|
|                                               | stove, and open fire; personal monitoring for PM <sub>2.5</sub> and CO conducted for 10-12-h period during the day (primary cooking hours); results reported for only one mother-child pair                                                                                                               |
| Ni et al. (under review)<br>(rural China)     | 22 non-smoking women who undertook primary cooking activities and burned wood in vented woodstoves; 4 paired measurements conducted in summer; 18 paired measurements conducted in winter                                                                                                                 |
| Peel et al. <i>unpub.</i><br>(rural Honduras) | 105 cross-sectional observations among non-smoking women who burned wood in traditional chimney stoves or improved-combustion chimney stoves ( <i>Justa</i> )                                                                                                                                             |
| St. Helen et al. 2015<br>(peri-urban Peru)    | 106 non-smoking women recruited during their first trimester of pregnancy; women undertook primary cooking activities and among those who participated fully, 17 burned wood, 33 burned LPG, 13 burned coal briquettes, 5 burned kerosene, and 30 burned a combination of fuels that included electricity |
| Wylie et al. 2016<br>(urban Tanzania)         | 239 non-smoking, pregnant women > 15 years old were recruited into a prospective observational cohort study; 118 successful paired personal PM <sub>2.5</sub> and CO exposure measurements                                                                                                                |

---

**Table S2. Categorization of covariates**

| <b>Covariate</b>                  | <b>Category 1 (reference)</b>                                                                | <b>Category 2</b>                                                                                             |
|-----------------------------------|----------------------------------------------------------------------------------------------|---------------------------------------------------------------------------------------------------------------|
| Fuel use                          | 'exclusive use of unprocessed biomass', which included wood, agricultural residues, cow dung | 'non-exclusive use of biomass'                                                                                |
| Level of urbanicity               | 'rural' setting                                                                              | 'peri-urban or urban' setting                                                                                 |
| Season of data collection         | 'non-heating' season (summer or dry)                                                         | 'heating' season (winter or rainy)                                                                            |
| Other local air pollution sources | 'absent' if none were reported                                                               | 'present' if environmental tobacco smoke, traffic, and/or other local sources of air pollution were specified |
| CO measurement                    | 'colorimetric' measurement based on passive diffusion of CO through dositubes                | 'sensor' measurement based on electrochemical or photoelectric response to CO by sensor                       |
| PM measurement                    | 'gravimetric'                                                                                | 'light-scattering'                                                                                            |

**Table S3. Personal PM<sub>2.5</sub> exposure measurement methods and quality assurance and quality control protocols**

| Author/Publication Year<br>(setting)                | PM Measurement Method<br>(duration, instruments, and interval)                                                                   | Reported Quality Assurance and Quality Control Protocols for PM Measurements                                                                                                                                                                                                                                                                                                                                                                                                                                                                                                              |
|-----------------------------------------------------|----------------------------------------------------------------------------------------------------------------------------------|-------------------------------------------------------------------------------------------------------------------------------------------------------------------------------------------------------------------------------------------------------------------------------------------------------------------------------------------------------------------------------------------------------------------------------------------------------------------------------------------------------------------------------------------------------------------------------------------|
| Armendáriz-Arnez et al. 2008<br>(rural China)       | 24-h; UCB particle monitor logged<br>PM <sub>2.5</sub> concentration every 1-min                                                 | --adjustment for inter-instrument variability observed in controlled combustion chamber experiments<br>--nephelometer sensitivity adjustment using co-located PM <sub>2.5</sub> gravimetric measurements                                                                                                                                                                                                                                                                                                                                                                                  |
| Balakrishnan et al., <i>unpub.</i><br>(rural India) | 24-h; gravimetric; pump (1.5 L/min) + cyclone + 37-mm PTFE filter backed with cellulose support                                  | --pump flow rates measured pre-/ post- measurement<br>--filters weighed on microbalance with ±1 µg sensitivity after 24-h conditioning in T/RH controlled room<br>--field blanks collected every 1 in 5 measurements                                                                                                                                                                                                                                                                                                                                                                      |
| Commodore et al. 2013<br>(rural Peru)               | Variable: 2.8 – 13.1 h; SidePak AM510 (TSI Inc) logged PM <sub>2.5</sub> concentration every 30-s                                | --zero-calibrated with HEPA filter before each use<br>-- PM <sub>2.5</sub> concentration adjusted with correction factor of 0.77 according to Jiang et al. (2011)                                                                                                                                                                                                                                                                                                                                                                                                                         |
| Dionisio et al. 2012<br>(peri-urban The Gambia)     | 48-h; gravimetric; pump (1.8 L/min) + personal exposure monitor (Harvard-PEM) + 37-mm PTFE filter backed with Whatman drain disc | --pump flow rates measured pre-/ post- measurement using a calibrated rotameter or digital mass flowmeter<br>--measurement excluded if <80% of target 48-h<br>--filters weighed on microbalance with ±1 µg sensitivity after 24-h conditioning in T/RH controlled room<br>--limit of detection (LOD) for filter weights calculated as 3 times the standard deviation of the mean absolute difference of blanks = 11.6 µg<br>--31 filter field blanks; mean absolute difference = 4.6 µg<br>--10 duplicate filter measurements; mean difference = 0.8% and mean absolute difference = 6.8% |
| Ellegard and Egneus 1993<br>(urban Zambia)          | Variable: ~4 – 5 h; gravimetric; pump (flow rate not specified) + cyclone + 37-mm Millipore SCWP filters                         | --none reported<br>--monitoring occurred for 4 – 5 hours during mid-day meal<br>--measured respirable fraction of particulate matter (aerodynamic diameter < 7.1 µm)                                                                                                                                                                                                                                                                                                                                                                                                                      |

---

|                                                        |                                                                                                                                             |                                                                                                                                                                                                                                                                                                                                                                                                                                                                                                                                     |
|--------------------------------------------------------|---------------------------------------------------------------------------------------------------------------------------------------------|-------------------------------------------------------------------------------------------------------------------------------------------------------------------------------------------------------------------------------------------------------------------------------------------------------------------------------------------------------------------------------------------------------------------------------------------------------------------------------------------------------------------------------------|
| Hartinger et al. 2013<br>(rural Peru)                  | 48-h; gravimetric; pump (1.5 L/min) + cyclone + filter (type not specified)                                                                 | --pump flow rates measured pre-/ post- measurement using a calibrated rotameter or digital mass flowmeter<br>--measurement excluded if <36-h<br>--filters weighed in duplicate on microbalance with $\pm 1 \mu\text{g}$ sensitivity after 48-h T/RH controlled conditioning ( $21 \pm 0.1 \text{ }^\circ\text{C}$ ; $40.9 \pm 1.5\% \text{ RH}$ )<br>-- 2 laboratory blanks; 28 field blanks ( $0.013 \pm 0.002 \text{ mg}$ ); 16 open blanks ( $0.004 \pm 0.001 \text{ mg}$ )<br>--US EPA QA Guidance Document cited (US EPA 2005) |
| Fitzgerald et al. 2011<br>(rural Peru)                 | 48-h; gravimetric; pump (1.5 L/min) + cyclone + 37-mm PTFE filter                                                                           | --pump flow rates measured pre-/ post- measurement using a calibrated rotameter or digital mass flowmeter<br>--measurement excluded if <36-h<br>--filters weighed in duplicate on microbalance with $\pm 1 \mu\text{g}$ sensitivity after 48-h T/RH controlled conditioning ( $20.6 \pm 1.4 \text{ }^\circ\text{C}$ ; $31 \pm 13\% \text{ RH}$ )<br>-- 30 field blanks; average mass equivalent to $0.88 \mu\text{g}/\text{m}^3$ for 48-h measurement period<br>--US EPA QA Guidance Document cited (US EPA 1998)                   |
| McCracken et al. 2013<br>(rural Guatemala)             | 24-h; gravimetric; pump (1.5 L/min) + cyclone + 37-mm PTFE filter with drain disc support                                                   | --pump flow rates measured pre-/ post- measurement using a soap bubble flow meter<br>--filters weighed with microbalance under atmosphere controlled conditions                                                                                                                                                                                                                                                                                                                                                                     |
| Mukhopadhyay et al. 2012<br>(rural India)              | Variable: during cooking period (duration not reported); gravimetric; pump (1.5 L/min) + cyclone + 37-mm PTFE filter with cellulose support | --pump flow rates measured pre-/ post- measurement using a calibrated rotameter<br>--filters weighed with Mettler balance (sensitivity not reported) after 24-h T/RH-controlled conditioning                                                                                                                                                                                                                                                                                                                                        |
| Naeher et al. 2000<br>(rural and semi-urban Guatemala) | Variable: ~10 – 12 h; gravimetric; pump (3.5 L/min) + cyclone + 37-mm PTFE-coated glass fiber filter with cellulose support                 | --pump flow rates measured every two days using a soap bubble flow meter<br>--filters weighed after 48-h T/RH-controlled conditioning<br>--12 field blanks collected                                                                                                                                                                                                                                                                                                                                                                |
| Ni et al. 2016<br>(rural China)                        | 48-h; gravimetric; pump (1.8 L/min) + personal exposure monitor (Harvard-PEM) + 37-mm PTFE filter backed                                    | --pump flow rates measured pre-/ post- measurement using a calibrated rotameter<br>--measurement excluded if <80% of target 48-h<br>--filters stored at $-30 \text{ }^\circ\text{C}$                                                                                                                                                                                                                                                                                                                                                |

---

---

|                                               |                                                                                                                              |                                                                                                                                                                                                                                                                                                                                                                                                                                                                                                                                                                                                                                                                                                                                                                                                                                                                                                                                                   |
|-----------------------------------------------|------------------------------------------------------------------------------------------------------------------------------|---------------------------------------------------------------------------------------------------------------------------------------------------------------------------------------------------------------------------------------------------------------------------------------------------------------------------------------------------------------------------------------------------------------------------------------------------------------------------------------------------------------------------------------------------------------------------------------------------------------------------------------------------------------------------------------------------------------------------------------------------------------------------------------------------------------------------------------------------------------------------------------------------------------------------------------------------|
|                                               | with metal screen                                                                                                            | --filters weighed on microbalance with $\pm 1 \mu\text{g}$ sensitivity after 24-h conditioning in T/RH controlled room ( $72.1 \pm 0.9 \text{ }^\circ\text{F}$ ; $31.2 \pm 1.8\% \text{ RH}$ )<br>--approx. 40 filter field blanks; mean pre-/post- mass difference = $24.7 \mu\text{g}$                                                                                                                                                                                                                                                                                                                                                                                                                                                                                                                                                                                                                                                          |
| Peel et al. <i>unpub.</i><br>(rural Honduras) | 24-h; gravimetric; pump (1.5 L/min, SKC AirChek XR5000) + cyclone (Triplex Cyclone) + 37-mm Fiberfilm filters (T60A20, Pall) | --pump flow rates pre-calibrated daily using a Bios International DryCal DC-Lite<br>--all pumps were programmed to run for 24 hours before automatically turning off<br>--measurements excluded if <75% of target time (n=4, no pumps ran between 75-100%)<br>--filters stored at $-20 \text{ }^\circ\text{C}$ in Honduras and $-80 \text{ }^\circ\text{C}$ in Colorado<br>--filters pre and post-weighed after 24-h equilibration in a T/RH-controlled room<br>--one measurement blank collected every 2 weeks (n=7, mean = $0.029 \text{ mg}$ , SD = $0.008 \text{ mg}$ ); LOD for filter weights calculated as 3 times the SD of the mean absolute difference of blanks = $0.054 \text{ mg}$ ; values < LOD replaced with LOD/(square root of 2)<br>--final time-weighted average values were blank-corrected and used the average of the pre- and post-flow rates (flow fault flags were created if the post flow was $<1.35 \text{ L/min}$ ) |
| St. Helen et al. 2015<br>(peri-urban Peru)    | 48-h; gravimetric; pump (1.5 L/min) + cyclone + 37-mm PTFE filter                                                            | --filters stored at $-30 \text{ }^\circ\text{C}$<br>--filters weighed in duplicate on microbalance with $\pm 1 \mu\text{g}$ sensitivity after 48-h T/RH controlled conditioning ( $70.0 \pm 4.0 \text{ }^\circ\text{F}$ ; $35 \pm 4\% \text{ RH}$ )<br>-- 48-h $\text{PM}_{2.5}$ concentrations were field-blank-corrected<br>--US EPA QA Guidance Document cited (US EPA 1998)                                                                                                                                                                                                                                                                                                                                                                                                                                                                                                                                                                   |
| Wylie et al. 2016<br>(peri-urban Tanzania)    | 48-h; gravimetric; pump (3.5 L/min) + cyclone + 37-mm PTFE filter                                                            | --filters weighed in duplicate on microbalance with $\pm 1 \mu\text{g}$ sensitivity after 24-h T/RH controlled conditioning ( $20.5 \pm 0.2 \text{ }^\circ\text{C}$ ; $39 \pm 2\% \text{ RH}$ )<br>-- 48-h $\text{PM}_{2.5}$ concentrations were field-blank-corrected<br>--US EPA QA Guidance Document cited (US EPA 1998)                                                                                                                                                                                                                                                                                                                                                                                                                                                                                                                                                                                                                       |

---



**Table S4. Personal CO exposure measurement methods and quality assurance and quality control protocols**

| <b>Author/Publication Year<br/>(setting)</b>      | <b>CO Measurement Method (duration,<br/>measurement devices, and interval)</b>                                                                                              | <b>Reported Quality Assurance and Quality Control Protocols for CO Measurements</b>                                                                                                                                                                                                                                                            |
|---------------------------------------------------|-----------------------------------------------------------------------------------------------------------------------------------------------------------------------------|------------------------------------------------------------------------------------------------------------------------------------------------------------------------------------------------------------------------------------------------------------------------------------------------------------------------------------------------|
| Armendáriz-Arnez et al. 2008<br>(rural China)     | 24-h; CO monitor not specified for personal exposure, but assumed to be same as was used for stationary CO measurements—HOBO CO monitor logged CO concentration every 1-min | --calibration with NIST traceable gas (5, 10, 25, 60 ppm) before measurement season<br>--adjustment to calibration made for inter-instrument variability observed in controlled combustion chamber experiments                                                                                                                                 |
| Balakrishnan et al., unpublished<br>(rural India) | 24-h; Drager Pac 7000 instrument logged CO concentration every 1-min                                                                                                        | --span gas calibration per manufacturer specifications (concentrations unspecified)                                                                                                                                                                                                                                                            |
| Commodore et al. 2013<br>(rural Peru)             | 48-h; Drager Pac III logged CO concentration every 30-s                                                                                                                     | --calibration before measurement campaign with 0 ppm (pure N <sub>2</sub> ) and 50 ppm levels                                                                                                                                                                                                                                                  |
| Dionisio et al. 2012<br>(peri-urban The Gambia)   | 72-h; Drager CO 50/a-D diffusion tubes, detection range 50-600 ppm-hr                                                                                                       | -- three replicate readings of color stain length recorded by a field worker<br>--independent color stain length verification by lab staff performed weekly with sealed, refrigerated tubes<br>--20% of tubes randomly selected for second set of replicate readings by all field workers to account for inter- and intra-observer variability |
| Ellegard and Egneus 1993<br>(urban Zambia)        | Variable: ~4 – 5 h; Drager CO diffusion tubes                                                                                                                               | --none reported                                                                                                                                                                                                                                                                                                                                |
| Hartinger et al. 2013<br>(rural Peru)             | 48-h; Drager Pac III logged CO concentration every 30-s                                                                                                                     | --none reported                                                                                                                                                                                                                                                                                                                                |
| Fitzgerald et al. 2011<br>(rural Peru)            | 48-h; Drager Pac III logged CO concentration every 30-s                                                                                                                     | --calibration before measurement campaign with 0 ppm (pure N <sub>2</sub> ) and 50 ppm levels<br>--reading range: 0 – 2000 ppm; resolution: 1 ppm                                                                                                                                                                                              |

---

|                                                        |                                                                             |                                                                                                                                                                                                                                                                                                            |
|--------------------------------------------------------|-----------------------------------------------------------------------------|------------------------------------------------------------------------------------------------------------------------------------------------------------------------------------------------------------------------------------------------------------------------------------------------------------|
| McCracken et al. 2013<br>(rural Guatemala)             | 24-h; HOBO passive electrochemical datalogger                               | --span gas calibration (no indication of timing or frequency)                                                                                                                                                                                                                                              |
| Mukhopadhyay et al. 2012<br>(rural India)              | 24-h; Drager Pac 7000 instrument logged CO concentration every 1-min        | --none reported                                                                                                                                                                                                                                                                                            |
| Naeher et al. 2000<br>(rural and semi-urban Guatemala) | 10 – 12-h; Drager CO diffusion tubes                                        | --color stain length recorded on-site immediately following measurement period or on the same day at the field base (sealed during transport from household to field base)<br>-- Draeger continuous CO monitors were calibrated every two weeks at the field base using 100 and 250 ppm CO calibration gas |
| Ni et al. 2016<br>(rural China)                        | 48-h; Drager CO 50/a-D diffusion tubes, detection range 50-600 ppm-hr       | -- two replicate readings of color stain length recorded independently by three field workers<br>--calibration with third order polynomial fit to the millimeter measurements corresponding to preprinted ppm-h markings on each batch of CO dositubes                                                     |
| Peel et al. <i>unpub.</i><br>(rural Honduras)          | 24-hr; Drager Pac 7000 logged CO maximum every 1-min                        | --instruments calibrated with 100 ppm CO gas in the lab prior to the field session<br>--LOD for the instrument is 1 ppm; all values <LOD were substituted with LOD/(square root of 2)                                                                                                                      |
| St. Helen et al. 2015<br>(peri-urban Peru)             | 48-h; Drager Pac III logged CO concentration every 30-s                     | --calibration before/after measurement campaign with 0 ppm (pure N <sub>2</sub> ) and 50 ppm<br>--pre-/post- calibration agreement within 5%                                                                                                                                                               |
| Wylie et al. 2016<br>(peri-urban Tanzania)             | 72 or 48-h; Drager CO 50/a-D diffusion tubes, detection range 50-600 ppm-hr | -- three replicate readings of color stain length recorded every 24-h by field staff<br>--calibration with third order polynomial fit to the millimeter measurements corresponding to preprinted ppm-h markings on each batch of CO dositubes                                                              |

---

**Table S5. Characteristics of studies with paired measurements of cooking area PM<sub>2.5</sub> and CO concentrations**

| Author/Year                  | Country                           | Fuel(s)                           | Other<br>Local Air Pollution<br>Sources | CO/PM Method                         |                                       | PM <sub>2.5</sub> -CO Correlation<br>Spearman <i>r</i> unless otherwise noted;<br>* if Pearson <i>r</i> |
|------------------------------|-----------------------------------|-----------------------------------|-----------------------------------------|--------------------------------------|---------------------------------------|---------------------------------------------------------------------------------------------------------|
|                              |                                   |                                   |                                         | CO<br>S <sup>a</sup> /D <sup>b</sup> | PM<br>G <sup>c</sup> /LS <sup>d</sup> |                                                                                                         |
| Alnes et al. 2014            | China                             | biomass, coal,<br>biogas          | ETS <sup>e</sup> (minimal)              | D                                    | LS                                    | 0.53 (n=179)<br>0.83 (n=55) open fires<br>0.42 (n=40) biomass stoves                                    |
| Armendáriz-Arnez et al. 2008 | Mexico                            | wood                              | ETS (minimal)                           | S                                    | LS                                    | 0.71 (n=60) * before intervention<br>0.80 (n=60) * after intervention                                   |
| Balakrishnan et al. 2015     | India                             | wood, dung                        |                                         | S                                    | G                                     | 0.48 (n=26)                                                                                             |
| Balakrishnan et al. 2013     | India                             | wood, dung                        |                                         | S                                    | G                                     | 0.10 (n=350)                                                                                            |
| Bruce et al. 2004            | Guatemala                         | wood, LPG <sup>f</sup>            | ETS (minimal)                           | D                                    | G                                     | 0.73 (n=24) for log(CO)-PM                                                                              |
| Chengappa et al. 2007        | India                             | wood, dung                        |                                         | S                                    | LS                                    | 0.86 (n=36) *                                                                                           |
| Chowdhury et al. 2012        | Bangladesh                        | wood, rice husks,<br>dung, leaves | ETS (minimal)                           | S                                    | LS                                    | 0.79 (n=31) *                                                                                           |
| Chowdhury et al. 2013        | China                             | wood                              |                                         | S                                    | LS                                    | 0.73 (n=56) *<br>0.86 (n=21) * open fires<br>0.85 (n=17) * biomass<br>0.87 (n=18) * w/ chimney          |
| Clark et al. 2007            | Guatemala                         | wood                              |                                         | S                                    | G                                     | 0.95 (n=10) *                                                                                           |
| Clark et al. 2010            | Honduras                          | wood                              |                                         | S                                    | G                                     | 0.61 to 0.69 (n=54)                                                                                     |
| Clark et al. 2011            | Nicaragua                         | wood                              | ETS (minimal)                           | S                                    | LS                                    | 0.76 (n=124)                                                                                            |
| Clark et al. 2013            | Nicaragua                         | wood                              | ETS (minimal)                           | S                                    | LS                                    | NR <sup>g</sup> (n = 25)                                                                                |
| Cleary et al. 1968           | New Guinea                        | wood                              |                                         | D                                    | G                                     | 0.72/0.87 (n=9) site 1/site 2                                                                           |
| Dasgupta et al. 2015         | Madagascar                        | wood, charcoal                    | ETS (minimal)                           | S                                    | LS                                    | NR (n=338)                                                                                              |
| de la Sota et al. 2014       | Senegal,<br>The Gambia,<br>Guinea | wood                              |                                         | S                                    | LS                                    | NR (n=149) before intervention<br>NR (n=175) after intervention                                         |

|                           |                    |                                       |               |        |                 |                                                                                                                                       |
|---------------------------|--------------------|---------------------------------------|---------------|--------|-----------------|---------------------------------------------------------------------------------------------------------------------------------------|
| Dionisio et al. 2008      | The Gambia         | wood, charcoal                        |               | D      | LS              | 0.85 (n=13) * 24-h<br>0.80 (n=13) * 48-h                                                                                              |
| Dionisio et al. 2012      | The Gambia         | wood, charcoal                        |               | D      | G               | 0.87 (n=213) *<br>0.83 (n=208) for CO 0 – 21 ppm<br>0.41 (n=41) for CO <1.3 ppm                                                       |
| Dutta et al. 2007         | India              | wood, dung                            |               | S      | LS              | 0.78 (n=37) *                                                                                                                         |
| Edwards et al. 2007       | China              | wood, crop residue, coal, LPG, biogas | ETS           | D      | G               | 0.27 (n=171) *<br>0.78 (n=20) wood, crop, coal<br>0.50 (n=21) crop residue                                                            |
| Ezzati et al. 2000        | Kenya              | wood, charcoal                        |               | S      | LS <sup>h</sup> | 0.48 (n=139) * burn<br>0.33 (n=131) * smolder<br>0.50 (n=115) * burn wood<br>0.35 (n=114) * smolder wood                              |
| Fischer and Koshland 2007 | China              | wood, LPG, coal, electricity          | ETS           | S<br>D | LS              | 0.50 (n=39) * sensor CO<br>0.45 (n=34) * colorimetric CO                                                                              |
| Fitzgerald et al., 2012   | Peru               | wood                                  |               | S      | G               | 0.80 (n=74)                                                                                                                           |
| Hankey et al., 2014       | Uganda             | wood                                  |               | S      | LS              | 0.40 (n=25) before intervention<br>0.32 (n=23) after intervention                                                                     |
| Hartinger et al. 2013     | Peru               | wood                                  | ETS           | S      | G               | 0.63 (n=61)<br>0.65 (n=32) open fires/non-OPTIMA<br>0.70 (n=40) OPTIMA stoves                                                         |
| He et al., 2005           | China              | coal, biomass                         | ETS           | D      | G               | 0.48 (n=128)                                                                                                                          |
| Henkle et al., 2010       | Honduras           | wood                                  | ETS           | S      | G <sup>i</sup>  | 0.14 (n=25)                                                                                                                           |
| Huboyo et al. 2014        | Indonesia          | wood, LPG                             | ETS           | S      | LS              | 0.76 (n=18) * site 1<br>0.96 (n=14) * site 2                                                                                          |
| Klasen et al. 2015        | Peru, Nepal, Kenya | biomass, LPG, kerosene                |               | S      | LS              | 0.59 Peru, 1-min PM <sub>2.5</sub> and CO<br>0.61 Nepal, 1-min PM <sub>2.5</sub> and CO<br>0.83 Kenya, 1-min PM <sub>2.5</sub> and CO |
| Leavey et al. 2015        | India              | biomass, dung                         | ETS (minimal) | S      | LS              | 0.71 (n=54 <sup>j</sup> ) Pearson                                                                                                     |
| Li et al. 2011            | Peru               | wood                                  |               | S      | G               | NR (n=57)                                                                                                                             |
| Li et al. 2012            | Tibetan            | dung                                  | ETS           | S      | LS              | 0.94 (n=20) hourly PM <sub>2.5</sub> and CO                                                                                           |

|                                   |                 |                               |               |     |                 |                                                                                                                 |
|-----------------------------------|-----------------|-------------------------------|---------------|-----|-----------------|-----------------------------------------------------------------------------------------------------------------|
|                                   | Plateau         |                               |               |     |                 |                                                                                                                 |
| Lodhi and Zain-al-Abdin 1999      | Malaysia        | wood, LPG                     | ETS           | S   | LS <sup>i</sup> | NR (n=NR)                                                                                                       |
| Marshall et al. ( <i>unpub.</i> ) | India           | wood                          |               | S   | G               | 0.65 (n=59)                                                                                                     |
| Morawska et al. 2011              | Lao PDR         | wood, electricity             | ETS           | D   | G <sup>i</sup>  | 0.01 (n=NR) open fires site 1<br>0.19 (n=NR) open fires site 2                                                  |
| Mukhopadhyay et al. 2012          | India           | wood, dung, LPG <sup>i</sup>  |               | S   | G               | NR (n=5)                                                                                                        |
| Muralidharan et al. 2015          | India           | wood, dung                    |               | S   | LS              | 0.82 (n=72 <sup>j</sup> )                                                                                       |
| Naeher et al. 2000a               | Guatemala       | wood, LPG                     |               | D   | G               | NR (n=27)                                                                                                       |
| Naeher et al. 2000b               | Guatemala       | wood, gas                     |               | S   | LS              | 0.81 (n=290)                                                                                                    |
| Naeher et al. 2001                | Guatemala       | wood, LPG                     |               | D   | G               | 0.94 (n=40)<br>0.70 (n=15) open fire<br>0.89 (n=25) stove w/chimney                                             |
| Ni et al. 2016                    | China           | wood                          | ETS           | D   | G               | 0.71 (n=98)                                                                                                     |
| Northcross et al. 2010            | Guatemala       | wood                          | ETS (minimal) | S/D | LS/G            | 0.87 (n=232) *<br>0.83 (n=122) * open fires<br>0.88 (n=110) * stove w/chimney                                   |
| Park et al. 2003                  | Costa Rica      | wood                          |               | S   | G               | 0.71 (n=21)                                                                                                     |
| Pearce et al. 2009                | Peru            | wood, dung, gas, kerosene     |               | S   | LS              | 0.57 (n=237 <sup>j</sup> ) partial correlation (adjust for fuel, location, time of day)                         |
| Peel et al. ( <i>unpub.</i> )     | Honduras        | wood                          |               | S   | G               | 0.86 (n=105)                                                                                                    |
| Pennise et al. 2009               | Ghana, Ethiopia | wood, ethanol                 | ETS (minimal) | S   | LS              | NR (n=69)                                                                                                       |
| Pollard et al. 2014               | Peru            | wood, dung, crop residue, LPG |               | S   | G               | 0.07 (n=32) * urban<br>0.67 (n=72) * rural<br>0.54 (n=34) * rural w/ chimney<br>0.79 (n=38) * rural, no chimney |
| Reid et al., 1986                 | Nepal           | wood                          |               | S   | G <sup>j</sup>  | NR (“positive relationship between kitchen CO and TSP”)                                                         |

|                            |              |                           |               |   |                 |                                                       |
|----------------------------|--------------|---------------------------|---------------|---|-----------------|-------------------------------------------------------|
| Rollin et al. 2004         | South Africa | wood, biomass, kerosene   | ETS           | D | G <sup>h</sup>  | NR (“no evidence of relationship between CO and RSP”) |
| Saatkamp et al., 2000      | Mexico       | wood                      |               | S | G <sup>h</sup>  | NR (n=230)                                            |
| Saksena et al. 1992        | India        | wood                      |               | S | G <sup>i</sup>  | 0.66 (n=124) <sup>j</sup>                             |
| Saksena et al. 2003        | India        | wood                      | ETS (minimal) | S | G <sup>i</sup>  | 0.96 (n=40) *                                         |
| Saksena et al. 2007        | Phillippines | wood                      |               | S | G <sup>m</sup>  | 0.49 (n=19)                                           |
| Sambandam et al. 2014      | India        | wood, crop residue, dung  |               | S | G               | 0.80 (n=167)                                          |
| Shrestha and Shrestha 2005 | Nepal        | biomass                   |               | D | LS <sup>k</sup> | NR (n=87)                                             |
| Siddiqui et al. 2009       | Pakistan     | wood, natural gas         |               | S | LS              | 0.72 (n=51) wood<br>0.37 (n=44) natural gas           |
| St. Helen et al. 2015      | Peru         | wood, LPG, coal, kerosene |               | S | G               | 0.51 (n=90)                                           |
| Yamamoto et al. 2014       | Burkina Faso | wood, charcoal            |               | D | LS <sup>m</sup> | 0.65 (n=119)                                          |

<sup>a</sup>sensor-based, <sup>b</sup>colorimetric/diffusion-based, <sup>c</sup>gravimetric, <sup>d</sup>light-scattering, <sup>e</sup>environmental tobacco smoke, <sup>f</sup>not reported, <sup>g</sup>liquefied petroleum gas, <sup>h</sup>respirable PM, <sup>i</sup>total suspended particles, <sup>j</sup>cooking session duration only, <sup>k</sup>PM<sub>10</sub> measured, <sup>m</sup>PM<sub>4</sub> measured.

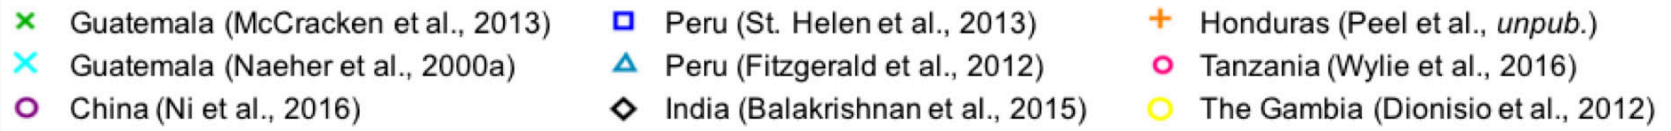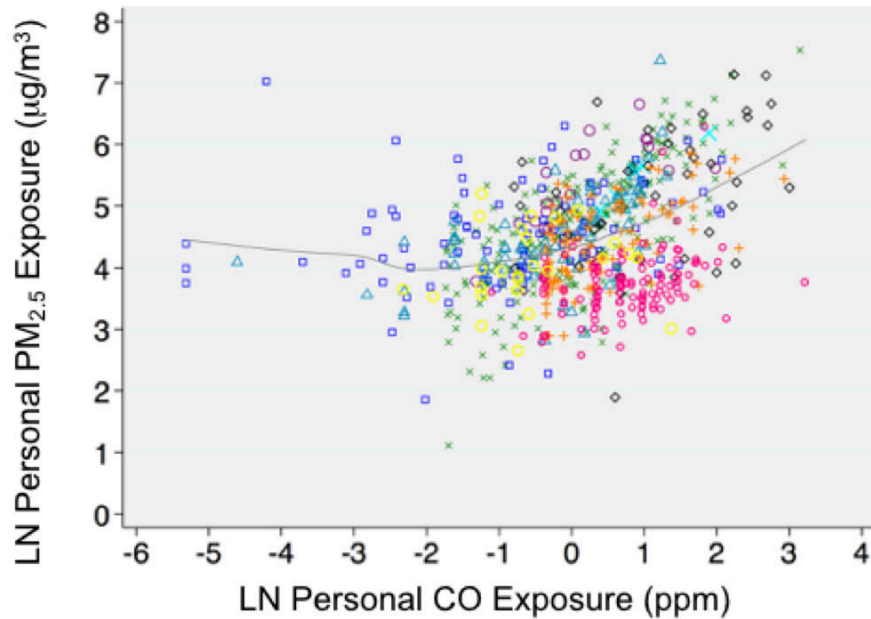

Figure S1a. Locally weighted scatterplot smoothing line shown for natural log-transformed  $PM_{2.5}$  personal exposures versus natural log-transformed CO personal exposures plotted for nine unique studies.

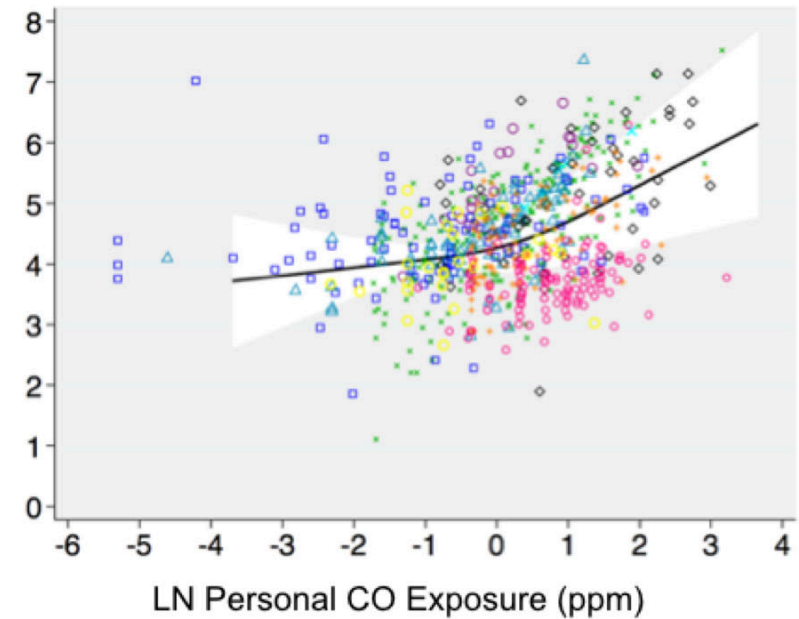

Figure S1b. Natural cubic spline model (3 knots)  $\ln(PM_{2.5})$  versus  $\ln(CO)$ , including fuel, urbanicity, season, CO measurement type, and study covariates in the model ( $n = 703$  pairs).

**Table S6.** Arithmetic and geometric (GM) means (95% confidence intervals (CI)) and ranges for nine studies with paired measurements of personal exposure to PM<sub>2.5</sub> and CO.

| PM <sub>2.5</sub> (µg/m <sup>3</sup> )             | N   | Mean (95% CI) <sup>a</sup> | GM (95% CI)    | Range   | IQR <sup>b</sup> |
|----------------------------------------------------|-----|----------------------------|----------------|---------|------------------|
| <b>Guatemala</b> (Nacher et al., 2000)             | 6   | 245 (109, 381)             | 221 (134, 366) | 136-481 | 149-279          |
| <b>China</b> (Ni et al., 2016)                     | 22  | 241 (161, 322)             | 186 (133, 260) | 44-770  | 103-343          |
| <b>The Gambia</b> (Dionisio et al., 2012)          | 29  | 65 (49, 80)                | 54 (42, 69)    | 14-179  | 38-82            |
| <b>India</b> (Balakrishnan et al., <i>unpub.</i> ) | 45  | 281 (191, 371)             | 160 (113, 227) | 7-1243  | 61-364           |
| <b>Peru</b> (Fitzgerald et al., 2012)              | 80  | 126 (85, 166)              | 88 (74, 104)   | 17-1565 | 57-156           |
| <b>Peru</b> (St. Helen et al., 2013)               | 93  | 127 (98, 157)              | 89 (75, 106)   | 6-1102  | 54-146           |
| <b>Honduras</b> (Peel et al., <i>unpub.</i> )      | 105 | 100 (87, 114)              | 80 (71, 92)    | 18-346  | 51-135           |
| <b>Tanzania</b> (Wylie et al., 2016)               | 118 | 49 (39, 60)                | 40 (37, 45)    | 13-528  | 31-54            |
| <b>Guatemala</b> (McCracken et al., 2013)          | 216 | 174 (146, 202)             | 106 (92, 122)  | 3-1843  | 51-214           |
| <b>Overall</b>                                     | 714 | 136 (123, 149)             | 85 (79, 91)    | 3-1843  | 43-155           |

| CO (ppm)                                           | N   | Mean (95% CI)  | GM (95% CI)    | Range    | IQR     |
|----------------------------------------------------|-----|----------------|----------------|----------|---------|
| <b>Guatemala</b> (Nacher et al., 2000)             | 6   | 2.9 (0.8, 4.9) | 2.5 (1.4, 4.3) | 1.5-6.7  | 1.9-6.7 |
| <b>China</b> (Ni et al., 2016)                     | 22  | 1.6 (0.9, 2.3) | 1.2 (0.9, 1.7) | 0.3-7.2  | 0.7-2.6 |
| <b>The Gambia</b> (Dionisio et al., 2012)          | 29  | 0.8 (0.4, 1.1) | 0.6 (0.4, 0.8) | 0-4.0    | 0.3-0.7 |
| <b>India</b> (Balakrishnan et al., <i>unpub.</i> ) | 45  | 4.9 (3.5, 6.4) | 3.1 (2.2, 4.2) | 0-20.3   | 1.4-6.9 |
| <b>Peru</b> (Fitzgerald et al., 2012)              | 80  | 1.2 (0.9, 1.4) | 0.8 (0.6, 1.0) | 0-3.7    | 0.4-1.9 |
| <b>Peru</b> (St. Helen et al., 2013)               | 93  | 1.1 (0.7, 1.4) | 0.4 (0.3, 0.6) | 0-8.0    | 0.1-1.2 |
| <b>Honduras</b> (Peel et al., <i>unpub.</i> )      | 105 | 2.1 (1.6, 2.6) | 1.5 (1.3, 1.7) | 0.7-19.0 | 0.8-2.3 |
| <b>Tanzania</b> (Wylie et al., 2016)               | 118 | 2.8 (2.3, 3.3) | 2.2 (1.9, 2.5) | 0.3-25.2 | 1.4-3.5 |
| <b>Guatemala</b> (McCracken et al., 2013)          | 216 | 1.9 (1.6, 2.3) | 1.1 (1.0, 1.3) | 0.2-23.6 | 0.5-2.4 |
| <b>Overall</b>                                     | 714 | 2.0 (1.9, 2.2) | 1.2 (1.1, 1.3) | 0-25.2   | 0.6-2.6 |

Eight observations reporting a zero value for CO exposure [three from The Gambia, four from Peru (St. Helen et al., 2013), three from Peru (Fitzgerald et al., 2012), and one from India] are included in the summary below because the corresponding PM<sub>2.5</sub> exposure concentrations are reasonable values (range: 14 to 155 µg/m<sup>3</sup>).



**Table S7.** Arithmetic and geometric (GM) means (95% confidence intervals (CI)) and ranges and interquartile ranges (IQR) for 18 studies with paired measurements of cooking area PM<sub>2.5</sub> and CO.

| PM <sub>2.5</sub> (µg/m <sup>3</sup> ) | N    | Mean (95% CI) <sup>a</sup> | GM (95% CI)      | Range     | IQR <sup>b</sup> |
|----------------------------------------|------|----------------------------|------------------|-----------|------------------|
| Guatemala (Naehler et al., 2000)       | 6    | 227 (-18, 472)             | 142 (48, 425)    | 57-528    | 57-528           |
| The Gambia (Dionisio et al., 2012)     | 18   | 665 (471, 860)             | 545 (383, 774)   | 123-1604  | 448-942          |
| Costa Rica (Park et al., 2003)         | 21   | 42 (27, 56)                | 32 (22, 46)      | 6-139     | 22-50            |
| Honduras (Henkle et al., 2010)         | 25   | 468 (275, 661)             | 251 (147, 430)   | 17-1525   | 83-575           |
| India (Balakrishnan et al. 2015)       | 26   | 274 (144, 405)             | 159 (103, 243)   | 29-1314   | 58-293           |
| Indonesia (Huboyo et al., 2013)        | 32   | 190 (141, 240)             | 155 (124, 195)   | 61-670    | 94-249           |
| India (Dutta et al. 2007)              | 36   | 1497 (1057, 1937)          | 1079 (818, 1423) | 225-6108  | 529-2179         |
| India (Chengappa et al. 2007)          | 36   | 540 (311, 770)             | 392 (308, 499)   | 125-4141  | 254-544          |
| China (Chowdhury et al., 2013)         | 53   | 262 (205, 320)             | 192 (153, 241)   | 29-922    | 101-340          |
| Guatemala (Naehler et al., 2001)       | 56   | 368 (277, 459)             | 230 (173, 305)   | 29-1606   | 103-547          |
| India (Marshall et al. <i>unpub.</i> ) | 59   | 241 (193, 289)             | 179 (145, 221)   | 20-811    | 104-329          |
| Peru (Fitzgerald et al., 2012)         | 74   | 242 (170, 314)             | 124 (94, 164)    | 4-1331    | 61-324           |
| Peru (Pollard et al., 2014)            | 82   | 117 (86, 148)              | 65 (51, 84)      | 4-839     | 24-151           |
| Peru (St. Helen et al., 2013)          | 94   | 91 (67, 116)               | 55 (45, 67)      | 1-665     | 34-88            |
| China (Ni et al. 2016)                 | 98   | 319 (199, 438)             | 152 (123, 189)   | 16-4429   | 72-308           |
| Honduras (Peel et al., <i>unpub.</i> ) | 105  | 252 (192, 311)             | 137 (110, 170)   | 18-1654   | 62-369           |
| India (Sambandam et al. 2014)          | 163  | 662 (506, 819)             | 316 (263, 380)   | 42-7333   | 117-701          |
| India (Balakrishnan et al. 2013)       | 350  | 776 (667, 885)             | 411 (364, 465)   | 25-8820   | 187-892          |
| <b>Overall</b>                         | 1334 | 476 (434, 516)             | 210 (196, 225)   | 1-8820    | 81-533           |
| CO (ppm)                               | N    | Mean (95% CI)              | GM (95% CI)      | Range     | IQR              |
| Guatemala (Naehler et al., 2000)       | 6    | 3 (0.8, 5.2)               | 2.5 (1.2, 5.0)   | 1.3-5.7   | 1.3-5.7          |
| The Gambia (Dionisio et al., 2012)     | 18   | 9.4 (6.8, 11.9)            | 7.7 (5.4, 11.0)  | 1.6-20.1  | 5.2-10.8         |
| Costa Rica (Park et al., 2003)         | 21   | 1.3 (1.0, 1.6)             | 1.1 (0.9, 1.4)   | 0.5-3.3   | 0.7-1.8          |
| Honduras (Henkle et al., 2010)         | 25   | 11.4 (7.8, 15.0)           | 12.4 (9.5, 16.1) | 0-27.5    | 5-15.5           |
| India (Balakrishnan et al. 2015)       | 26   | 10.3 (6.7, 13.9)           | 7.6 (5.3, 11.0)  | 0-33.5    | 3.5-14.3         |
| Indonesia (Huboyo et al., 2013)        | 32   | 2.5 (1.9, 3.1)             | 1.7 (1.1, 2.6)   | 0-7.0     | 1.1-3.7          |
| India (Dutta et al. 2007)              | 36   | 14.1 (11.1, 17.0)          | 11.4 (9.1, 14.4) | 3.1-33.5  | 7.0-20.6         |
| India (Chengappa et al. 2007)          | 36   | 8.6 (6.4, 10.8)            | 6.9 (5.6, 8.6)   | 2.1-29.9  | 4.1-10.1         |
| China (Chowdhury et al., 2013)         | 53   | 4.1 (3.2, 5.0)             | 3.0 (2.3, 3.8)   | 0.2-15.2  | 1.6-6.3          |
| Guatemala (Naehler et al., 2001)       | 56   | 4.5 (3.4, 5.7)             | 2.3 (1.5, 3.5)   | 0-18.7    | 1.3-7.2          |
| India (Marshall et al. <i>unpub.</i> ) | 59   | 3.5 (2.8, 4.3)             | 2.0 (1.4, 2.9)   | 0.02-11.2 | 1.4-5.2          |
| Peru (Fitzgerald et al., 2012)         | 74   | 3.6 (2.5, 4.7)             | 1.7 (1.3, 2.4)   | 0-24.8    | 0.7-4.5          |
| Peru (Pollard et al., 2014)            | 82   | 5.4 (4.0, 6.8)             | 1.9 (1.2, 2.9)   | 0-34.0    | 0.7-9.0          |
| Peru (St. Helen et al., 2013)          | 94   | 3.4 (2.1, 4.8)             | 0.9 (0.6, 1.4)   | 0-46.9    | 0.2-3.7          |
| China (Ni et al. 2016)                 | 98   | 2.0 (1.2, 2.8)             | 1.0 (0.8, 1.2)   | 0.1-34.8  | 0.5-1.8          |
| Honduras (Peel et al., <i>unpub.</i> ) | 105  | 3.9 (2.6, 5.2)             | 1.9 (1.5, 2.3)   | 0.7-40.3  | 0.8-3.3          |
| India (Sambandam et al. 2014)          | 163  | 5.6 (4.6, 6.5)             | 2.9 (2.3, 3.6)   | 0-32.8    | 1.1-7.3          |
| India (Balakrishnan et al. 2013)       | 350  | 2.2 (1.9, 2.5)             | 1.0 (0.8, 1.1)   | 0.2-11.0  | 0.3-3.0          |
| <b>Overall</b>                         | 1334 | 4.2 (3.9, 4.5)             | 1.8 (1.7, 2.0)   | 0-46.9    | 0.6-5.7          |

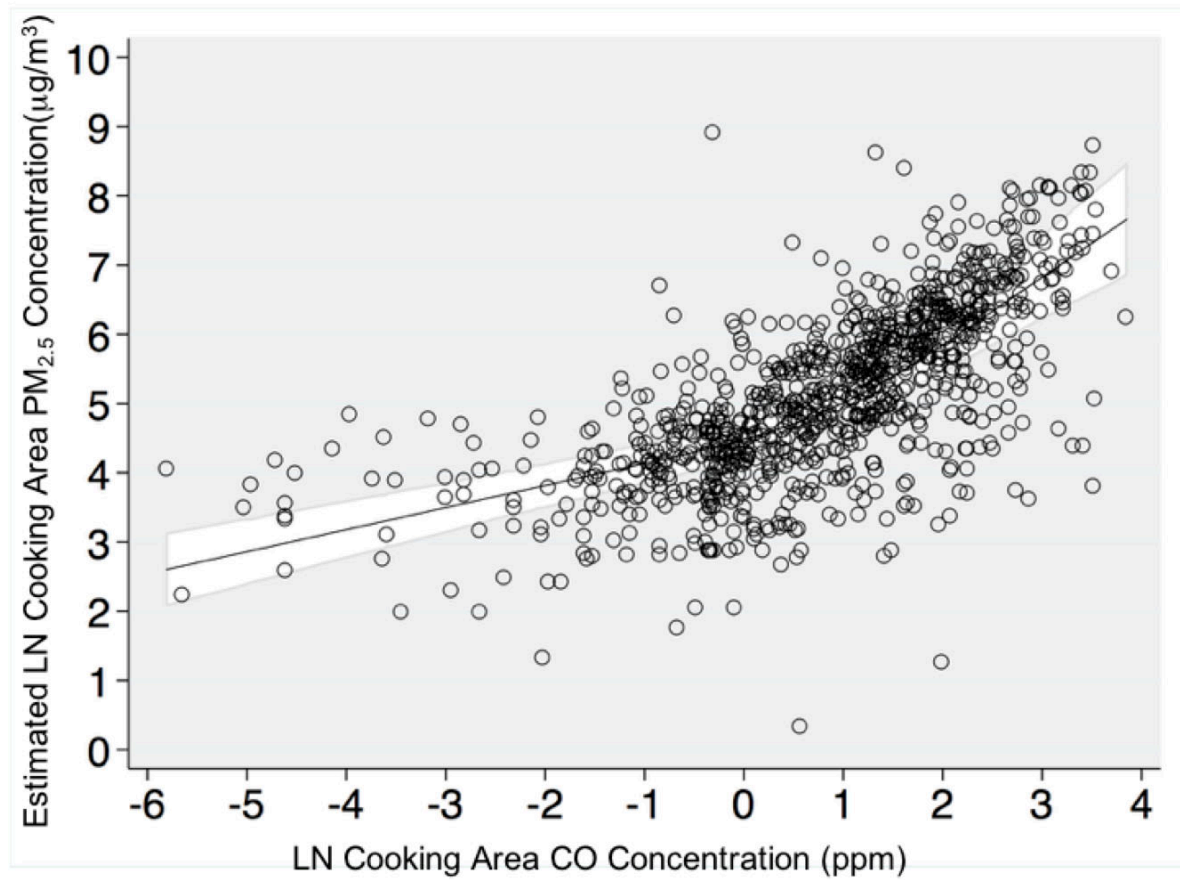

Figure S2. Natural cubic spline model (3 knots) of the  $\ln(\text{PM}_{2.5})$ - $\ln(\text{CO})$  relationship with 95% confidence intervals for cooking area  $\text{PM}_{2.5}$  and CO concentrations ( $n=981$  paired observations from 17 of 18 studies in the pooled analysis).

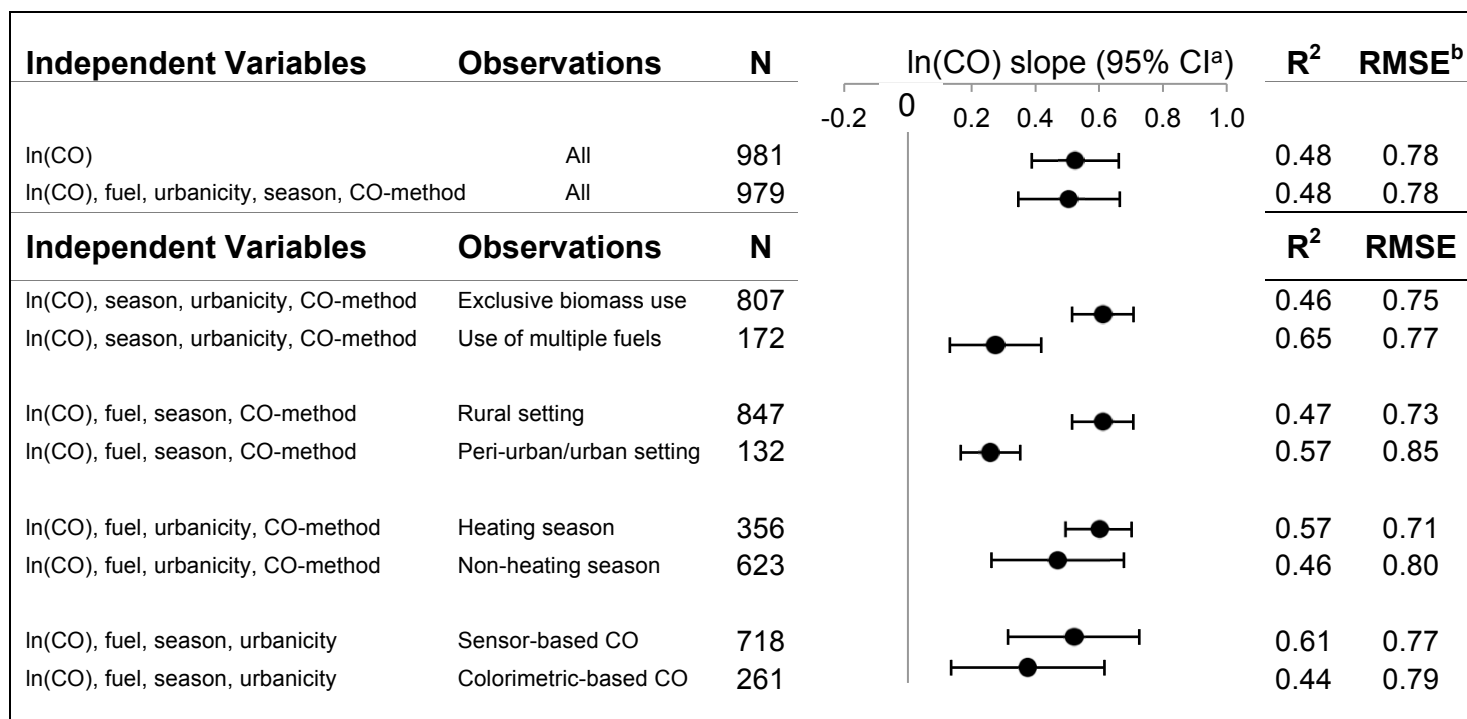

<sup>a</sup>confidence intervals, <sup>b</sup>root mean squared error

Figure S3. Comparison of estimates of the slope of  $\ln(\text{PM}_{2.5})$  on  $\ln(\text{CO})$  ( $\pm 95\%$  confidence intervals) for cooking area concentrations using univariate and multivariate linear regression models for the full dataset and stratified by fuel use, setting, season, and CO measurement. The  $R^2$  values and RMSE for each model are reported to the right of the plotted  $\ln(\text{CO})$  slope.

**Table S8.** Comparison of  $R^2$  and root mean squared error (RMSE) are reported for models of  $\ln(\text{PM}_{2.5})$  exposure on un-transformed CO exposure, [CO], using all data and stratified subsets.

| <b>Independent Variables</b>              | <b>Observations</b>   | <b>N</b> | <b><math>R^2</math></b> | <b>RMSE</b> |
|-------------------------------------------|-----------------------|----------|-------------------------|-------------|
| [CO]                                      | All                   | 714      | 0.14                    | 0.76        |
| [CO], fuel, urbanicity, season, CO method | All                   | 714      | 0.19                    | 0.76        |
| [CO], urbanicity, season, CO method       | Exclusive biomass use | 573      | 0.24                    | 0.77        |
| [CO], urbanicity, season, CO method       | Use of multiple fuels | 141      | 0.21                    | 0.77        |
| [CO], fuel, season, CO method             | Rural                 | 482      | 0.31                    | 0.80        |
| [CO], fuel, season, CO method             | Peri-urban            | 232      | 0.24                    | 0.68        |
| [CO], fuel, urbanicity, CO method         | Heating               | 458      | 0.39                    | 0.80        |
| [CO], fuel, urbanicity, CO method         | Non-heating           | 256      | 0.12                    | 0.69        |
| [CO], fuel, season, urbanicity            | Sensor CO             | 539      | 0.27                    | 0.80        |
| [CO], fuel, season, urbanicity            | Colorimetric CO       | 175      | 0.35                    | 0.66        |

**Table S9.** Comparison of  $R^2$  and root mean squared error (RMSE) are reported for models of  $\ln(\text{PM}_{2.5})$  exposure on un-transformed CO cooking area concentrations, [CO], using all data and stratified subsets.

| <b>Independent Variables</b>              | <b>Observations</b>   | <b>N</b> | <b><math>R^2</math></b> | <b>RMSE</b> |
|-------------------------------------------|-----------------------|----------|-------------------------|-------------|
| [CO]                                      | All                   | 992      | 0.23                    | 0.95        |
| [CO], fuel, urbanicity, season, CO method | All                   | 990      | 0.28                    | 0.91        |
| [CO], urbanicity, season, CO method       | Exclusive biomass use | 815      | 0.20                    | 0.95        |
| [CO], urbanicity, season, CO method       | Use of multiple fuels | 172      | 0.67                    | 0.74        |
| [CO], fuel, season, CO method             | Rural                 | 854      | 0.17                    | 0.93        |
| [CO], fuel, season, CO method             | Peri-urban            | 136      | 0.58                    | 0.83        |
| [CO], fuel, urbanicity, CO method         | Heating               | 358      | 0.56                    | 0.76        |
| [CO], fuel, urbanicity, CO method         | Non-heating           | 632      | 0.30                    | 0.92        |
| [CO], fuel, season, urbanicity            | Sensor CO             | 728      | 0.27                    | 0.94        |
| [CO], fuel, season, urbanicity            | Colorimetric CO       | 262      | 0.56                    | 0.82        |

**Table S10.** Comparison of univariate and multivariate model results for individual studies, adjusting for as many covariates as there was variation to do so. The  $R^2$  and root mean squared error (RMSE) are reported for each model.

| <b>Independent Variables</b>       | <b>N</b> | <b>R<sup>2</sup></b> | <b>RMSE</b> |
|------------------------------------|----------|----------------------|-------------|
| China (Ni et al., 2016)            |          |                      |             |
| ln(CO)                             | 22       | 0.42                 | 0.59        |
| ln(CO), fuel, season               | 22       | 0.51                 | 0.58        |
| Peru (St. Helen et al., 2015)      |          |                      |             |
| ln(CO)                             | 89       | 0.05                 | 0.83        |
| ln(CO), fuel, season               | 89       | 0.08                 | 0.83        |
| Peru (Fitzgerald et al., 2012)     |          |                      |             |
| ln(CO)                             | 77       | 0.32                 | 0.63        |
| ln(CO), fuel, season               | 77       | 0.37                 | 0.61        |
| India (Balakrishnan et al., 2015)  |          |                      |             |
| ln(CO)                             | 44       | 0.19                 | 1.02        |
| ln(CO), fuel, season               | 44       | 0.32                 | 0.94        |
| Tanzania (Wylie et al., 2016)      |          |                      |             |
| ln(CO)                             | 118      | 0.11                 | 0.50        |
| ln(CO), fuel, setting, season      | 118      | 0.13                 | 0.50        |
| The Gambia (Dionisio et al., 2012) |          |                      |             |
| ln(CO)                             | 26       | 0.01                 | 0.65        |
| ln(CO), fuel, season               | 26       | 0.20                 | 0.61        |

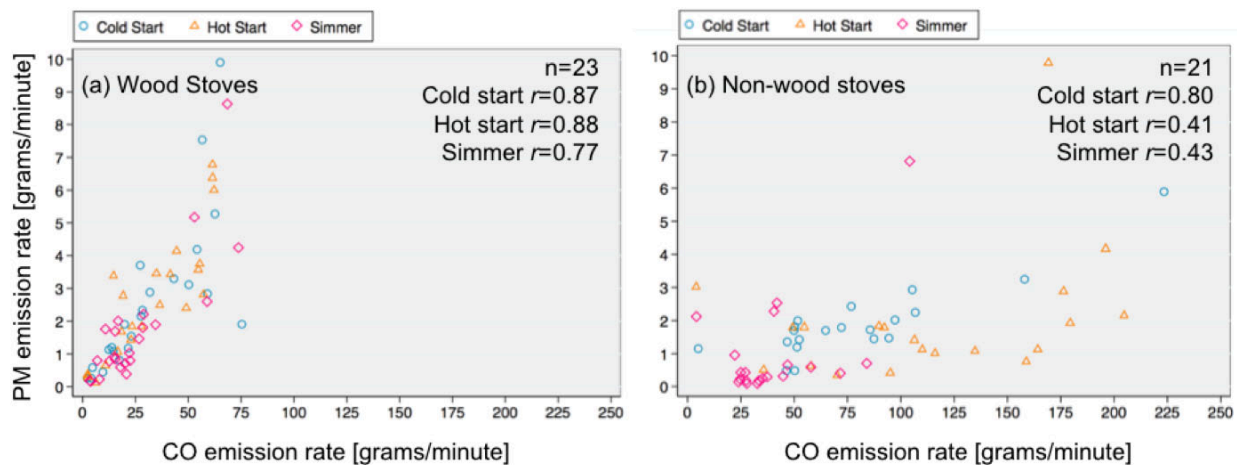

Figure S4. PM versus CO emission rates (grams/minute) from standardized Water Boiling Tests conducted by Jetter et al. (2012) for stove-fuel combinations tested with wood fuel only (a) and stove-fuel combinations tested with non-wood fuel (b) under conditions of cold start, hot start, and simmering.

## REFERENCES

Comp, the following references are cited in Table S1 of the supplemental materials for the paper EHP767. Please add these to the supplemental materials file for the paper.

Chowdhury Z, Le LT, Masud AA, Chang KC, Alauddin M, Hossain M, et al. 2012. Quantification of indoor air pollution from using cookstoves and estimation of its health effects on adult women in northwest Bangladesh. *Aerosol Air Qual Res* 12:463–475.

Clark ML, Bazemore H, Reynolds SJ, Heiderscheidt JM, Conway S, Bachand AM, et al. 2011. A baseline evaluation of traditional cookstove smoke exposures and indicators of cardiovascular and respiratory health among Nicaraguan women. *IntJ Occup Environ Health* 17:113–121, <https://doi.org/10.1179/oeh.734.2011.17.2.113>.

Clark ML, Reynolds SJ, Burch JB, Conway S, Bachand AM, Peel JL. 2010. Indoor air pollution, cookstove quality, and housing characteristics in two Honduran communities. *Environ Res* 110:12–18, PMID: 19922911, <https://doi.org/10.1016/j.envres.2009.10.008>.

Cleary GJ, Blackburn CRB. 1968. Air pollution in native huts in the highlands of New Guinea. *Arch Environ Health* 17:785–794, PMID: 5698496.

Dasgupta S, Martin P, Samad HA. 2013. Addressing household air pollution: a case study in rural Madagascar. World Bank Policy Research Working Paper 6627.

de la Sota C, Lumbreras J, Mazorra J, Narros A, Fernández L, et al. 2014. Effectiveness of improved cookstoves to reduce indoor air pollution in developing countries. The case of the Cassamance Natural Subregion, Western Africa. *GEP2*(1):1–5.

Edwards RD, Liu Y, He G, Yin Z, Sinton J, Peabody J, et al. 2007. Household CO and PM measured as part of a review of China's National Improved Stove Program. *Indoor Air* 17:189–203, PMID: 17542832, <https://doi.org/10.1111/j.1600-7810.2007.00465.x>.

Ezzati M, Saleh H, Kammen DM. 2000. The contributions of emissions and spatial microenvironments to exposure to indoor air pollution from biomass combustion in Kenya. *Environ Health Perspect* 108:833–839, PMID: 11017887.

Hankey S, Sullivan K, Kinnick A, Koskey A, Grande K, Davidson JH, et al. 2015. Using objective measures of stove use and indoor air quality to evaluate a cookstove intervention in rural Uganda. *Energy Sustain Dev* 25:67–74, <https://doi.org/10.1016/j.esd.2014.12.007>.

He G, Ying B, Liu J, Gao S, Shen S, Balakrishnan K, et al. 2005. Patterns of household concentrations of multiple indoor air pollutants in China. *Environ Sci Technol* 39:991–998, PMID: 15773470.



- Li C, Kang S, Chen P, Zhang Q, Guo J, Mi J, et al. 2012. Personal PM<sub>2.5</sub> and indoor CO in nomadic tents using open and chimney biomass stoves on the Tibetan Plateau. *Atmos Environ* 59:207–213, <https://doi.org/10.1016/j.atmosenv.2012.05.872> 033.
- Li Z, Sjödin A, Romanoff LC, Horton K, Fitzgerald CL, Eppler A, et al. 2011. Evaluation of exposure reduction to indoor air pollution in stove intervention projects in Peru by urinary biomonitoring of polycyclic aromatic hydrocarbon metabolites. *Environ Int* 37:1157–1163, PMID: 21524795, <https://doi.org/10.1016/j.envint.2011.03.024>.
- Lodhi MAK, Zain-al-Abdin A. 1999. Indoor air pollutants produced from fossil fuel and biomass. *Energy Convers Manag* 40:243–248, [https://doi.org/10.1016/S0196-8804\(98\)00118-6](https://doi.org/10.1016/S0196-8804(98)00118-6).
- Morawska L, Mengersen K, Wang H, Tayphasavanh F, Darasavong K, Holmes NS. 2010. Pollutant concentrations within households in Lao PDR and association with housing characteristics and occupants' activities. *Environ Sci Technol* 45:882–889, PMID: 21171562, <https://doi.org/10.1021/es102294v>.
- Pennise D, Brant S, Agbeve SM, Quaye W, Mengesha F, Tadele W, et al. 2009. Indoor air quality impacts of an improved woodstove in Ghana and an ethanol stove in Ethiopia. *Energy Sustain Dev* 13:71–76, <https://doi.org/10.1016/j.esd.2009.04.003>.
- Pollard SL, Williams DL, Breyse PN, Baron PA, Grajeda LM, Gilman RH, et al. 2014. A cross-sectional study of determinants of indoor environmental exposures in households with and without chronic exposure to biomass fuel smoke. *Environ Health* 13:21, PMID: 24655424, <https://doi.org/10.1186/1476-069X-13-21>.
- Saksena S, Prasad R, Pal RC, Joshi V. 1992. Patterns of daily exposure to TSP and CO in the Garhwal Himalaya. *Atmos Environ. Part A. General Topics* 26:2125–2134.
- Saksena S, Singh PB, Prasad RK, Prasad R, Malhotra P, Joshi V, et al. 2003. Exposure of infants to outdoor and indoor air pollution in low-income urban areas— a case study of Delhi. *J Expo Anal Environ Epidemiol* 13:219–230, PMID: 12743616, <https://doi.org/10.1038/sj.jea.7500273>.
- Sambandam S, Balakrishnan K, Ghosh S, Sadasivam A, Madhav S, Ramasamy R, et al. 2015. Can currently available advanced combustion biomass cook-stoves provide health relevant exposure reductions? Results from initial assessment of select commercial models in India. *Ecohealth* 12:25–41, PMID: 25293811, 1033 <https://doi.org/10.1007/s10393-014-0976-1>.
- Shrestha L, Shrestha SL. 2005. Indoor air pollution from biomass fuels and respiratory health of the exposed population in Nepalese households. *Int J Occup Environ Health* 11:150–160, PMID: 15875891, <https://doi.org/10.1179/oeh.2005.11.2.150>.
- Siddiqui AR, Lee K, Bennett D, Yang X, Brown KH, Bhutta ZA, et al. 2009. Indoor carbon monoxide and PM<sub>2.5</sub> concentrations by cooking fuels in Pakistan. *Indoor Air* 19:75–82, PMID: 19076247, <https://doi.org/10.1111/j.1600-0668.2008.104400563.x>.

Yamamoto SS, Louis VR, Sié A, Sauerborn R. 2014. Biomass smoke in Burkina Faso: what is the relationship between particulate matter, carbon monoxide, and kitchen characteristics?. *Environ Sci Pollut Res Int* 21:2581–2591, PMID: 1126 2419796 2, <https://doi.org/10.1007/s11356-013-2062-6>.
